# Supplementary material
Source: PubMed Central journal article supplement (PMC2900664)

# Supporting Information

Zheng et al. 10.1073/pnas.1003953107

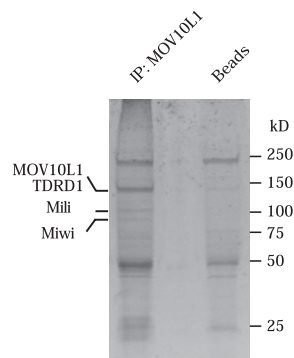

**Fig. S1.** Purification and characterization of MOV10L1-associated proteins from 18- to 20-d-old testes by immunoprecipitation (IP) and mass spectrometry. Protein identity for each band is indicated. In brief, to isolate MOV10L1-associated proteins, eight pairs of 18- to 20-d testes ( $\approx 300$  mg) were homogenized in 3 mL radioimmunoprecipitation assay buffer (RIPA) in the presence of proteinase inhibitor mixture. Protein lysate was centrifuged twice. Supernatants were precleared with protein A agarose beads. Precleared lysate incubated with affinity-purified anti-MOV10L1 antibody, followed by binding to protein A agarose beads. Immunoprecipitated proteins were extensively washed, run on a 4–15% gradient SDS/PAGE gel, and stained with SYPRO Ruby (Bio-Rad).

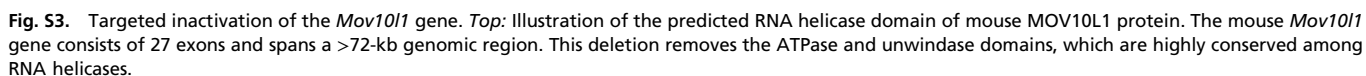

Supplement: 1003953107_pnas.201003953SI.pdf [file 1003953107_pnas.201003953SI.pdf]
